# Supplementary material for: An oligoclonal antibody durably overcomes resistance of lung cancer to third‐generation EGFR inhibitors
Source: PubMed Central journal article supplement (PMC5801506; doi:10.15252/emmm.201708076), 2017-12-06
Supplement: EMMM-10-294-s004.pdf [file EMMM-10-294-s004.pdf]

**Figure 1C**

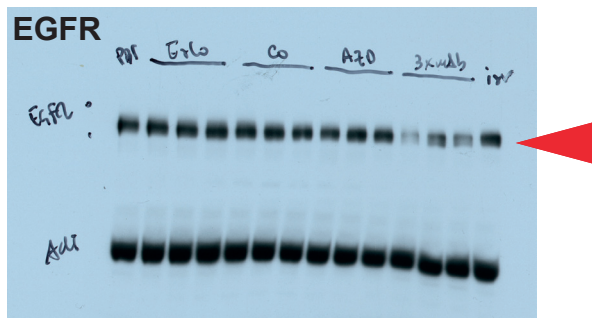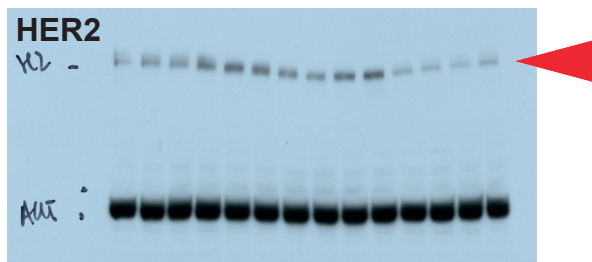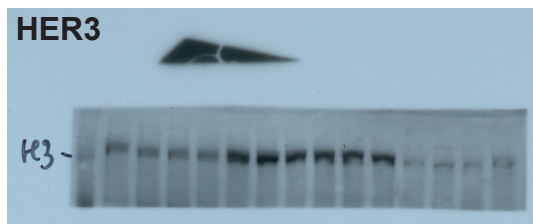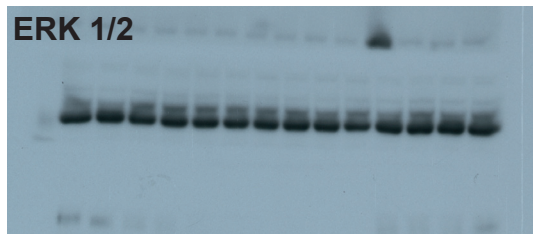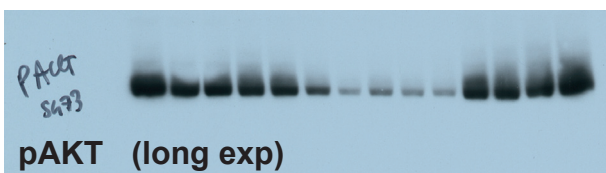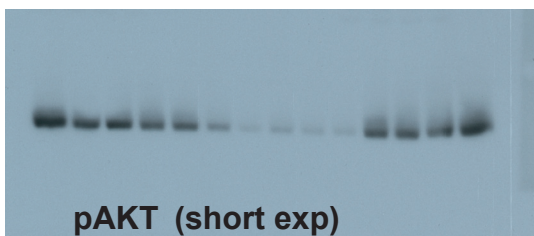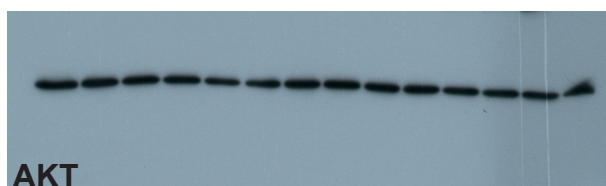

01/06/2015

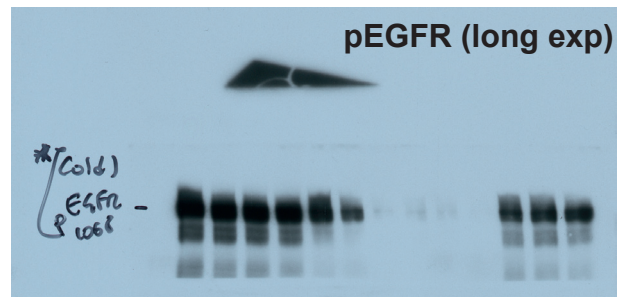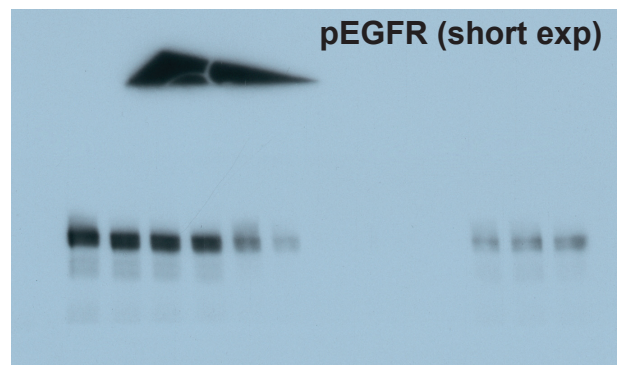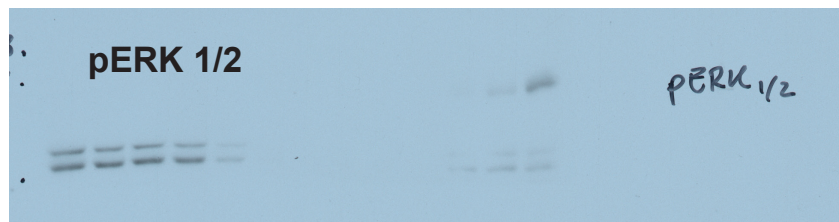

03/06/2015

**\*Please note:**

the "Irrelevant antibody" conditions (Irr), which appear in the blots from 01.06.2015 was omitted in the blots from 03.06.2015 and as well in the main figure.
