# Supplementary material for: An oligoclonal antibody durably overcomes resistance of lung cancer to third‐generation EGFR inhibitors
Source: PubMed Central journal article supplement (PMC5801506; doi:10.15252/emmm.201708076), 2017-12-06
Supplement: EMMM-10-294-s005.pdf [file EMMM-10-294-s005.pdf]

Figure 2B

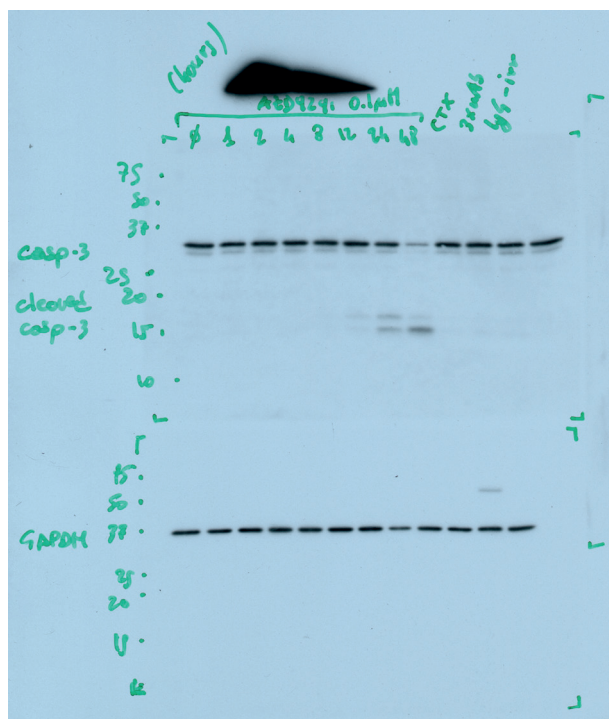

19/05/2015

Caspase 3 and Cleaved-caspase 3

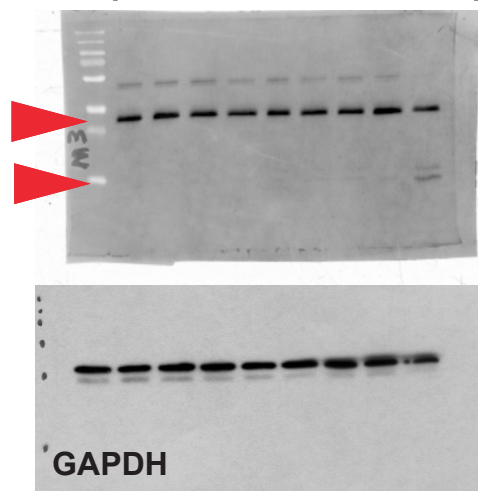

11/07/2017

**Figure 2D**

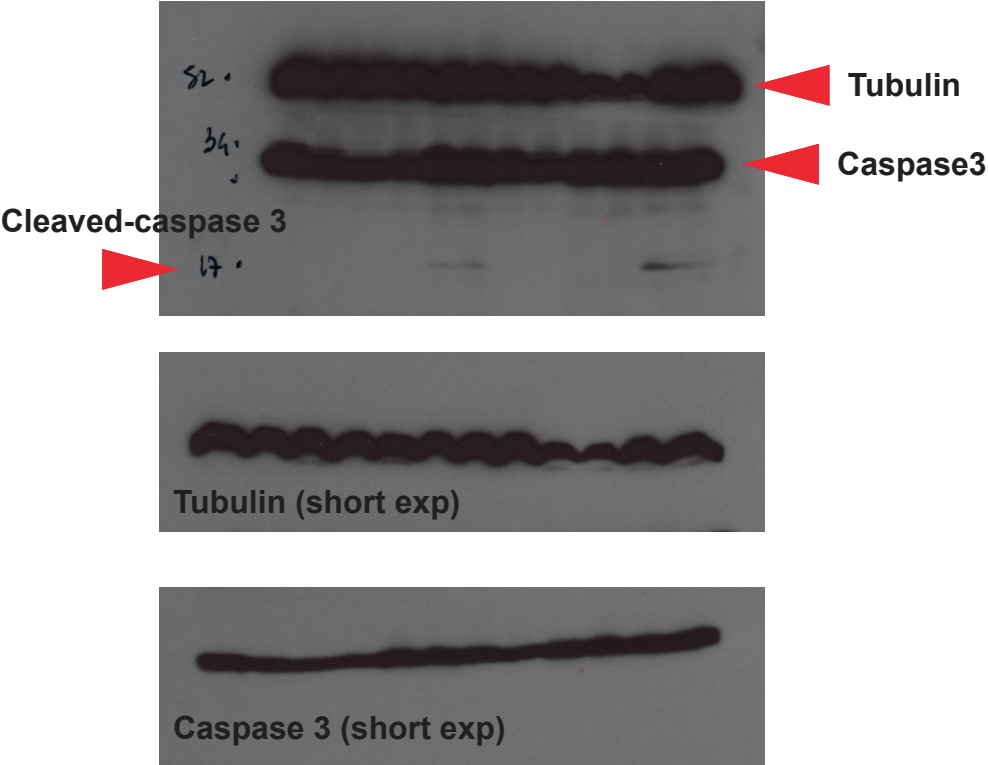

22/11/2016
