# Supplementary material for: An oligoclonal antibody durably overcomes resistance of lung cancer to third‐generation EGFR inhibitors
Source: PubMed Central journal article supplement (PMC5801506; doi:10.15252/emmm.201708076), 2017-12-06

**Figure 3B**

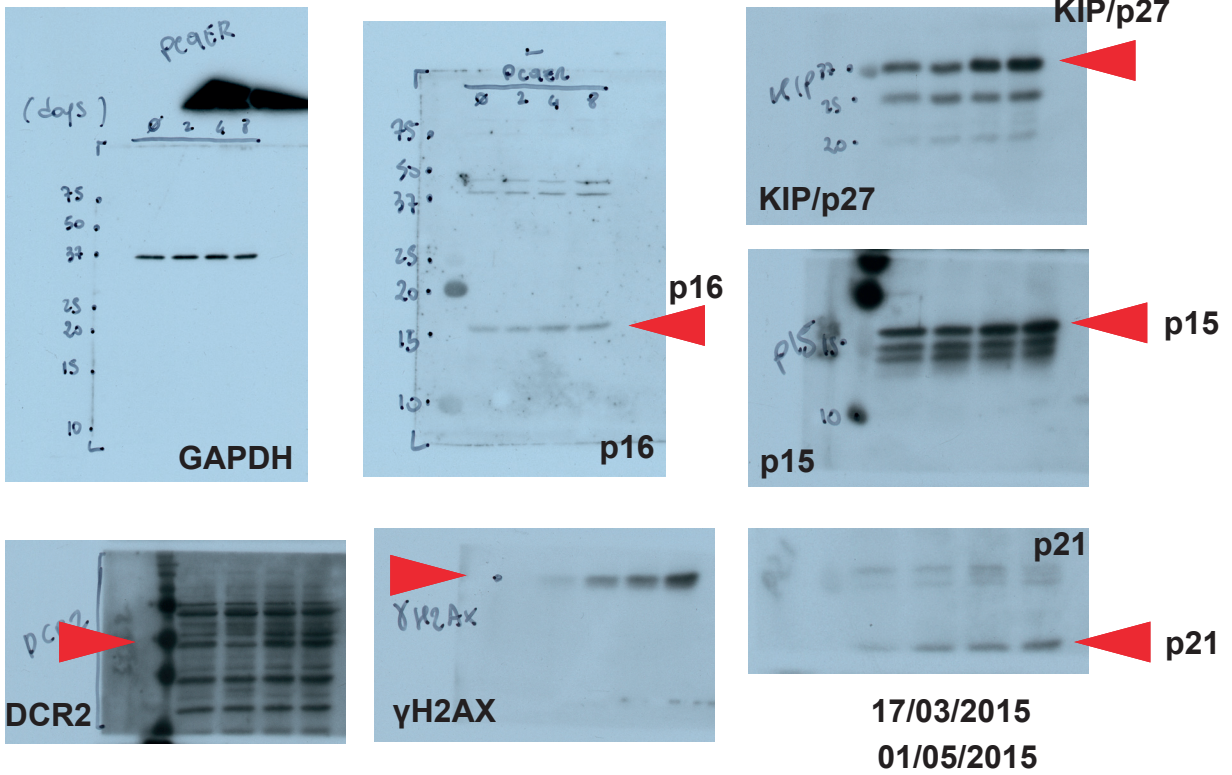

Supplement: EMMM-10-294-s006.pdf [file EMMM-10-294-s006.pdf]
