# Supplementary material for: An oligoclonal antibody durably overcomes resistance of lung cancer to third‐generation EGFR inhibitors
Source: PubMed Central journal article supplement (PMC5801506; doi:10.15252/emmm.201708076), 2017-12-06
Supplement: EMMM-10-294-s007.pdf [file EMMM-10-294-s007.pdf]

Figure 5A

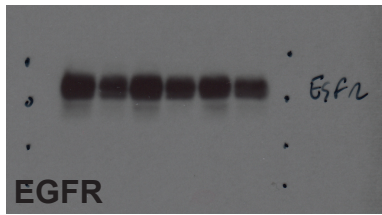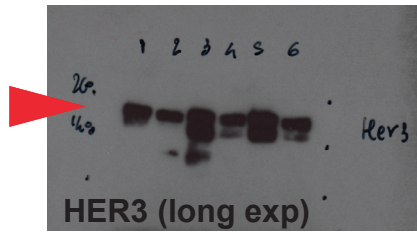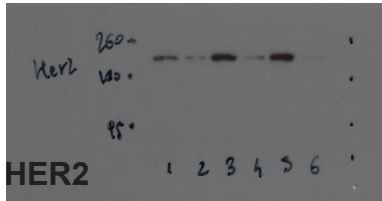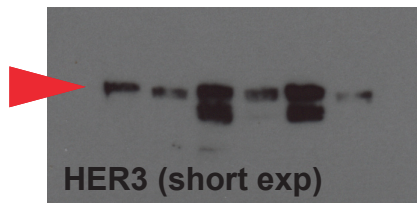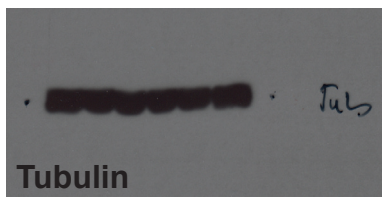

22/11/2016

**Figure 5C**

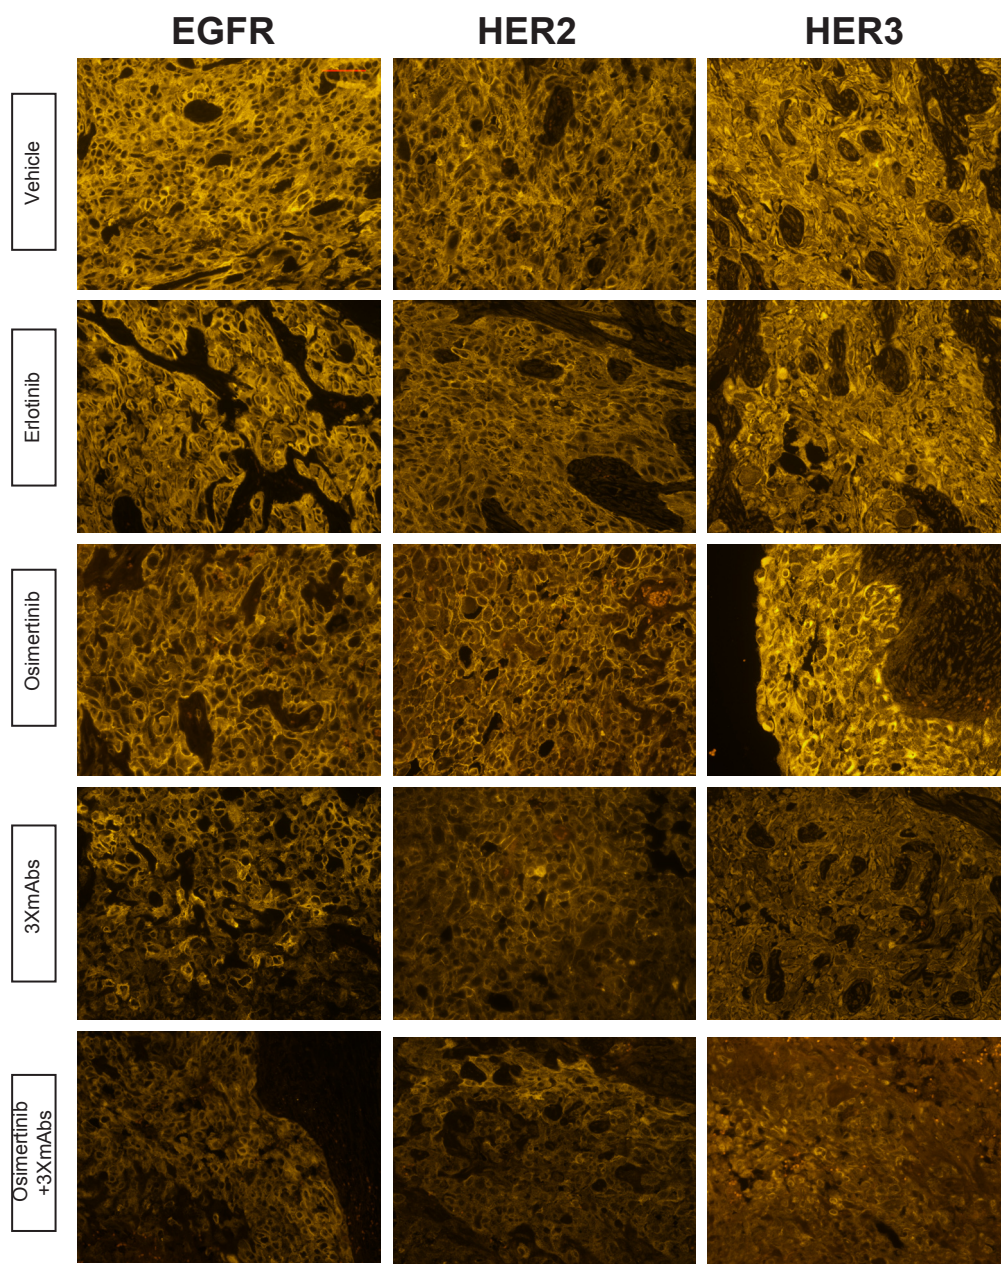

**Figure 5D**

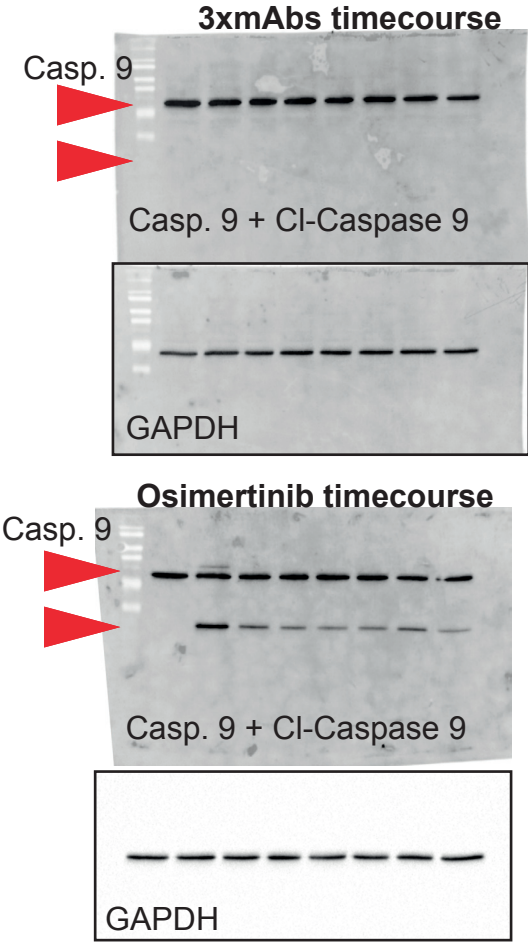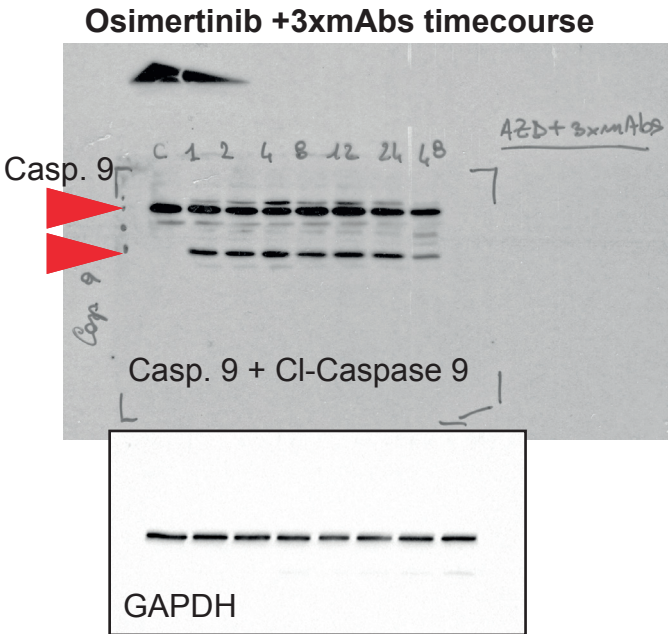

23-26/12/2016

**Figure 5E**

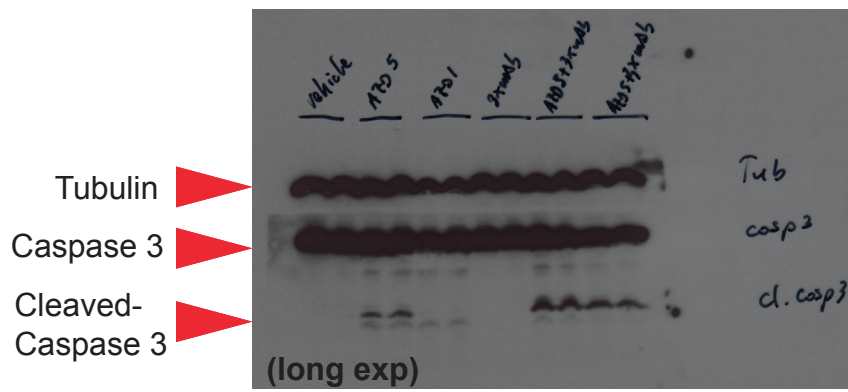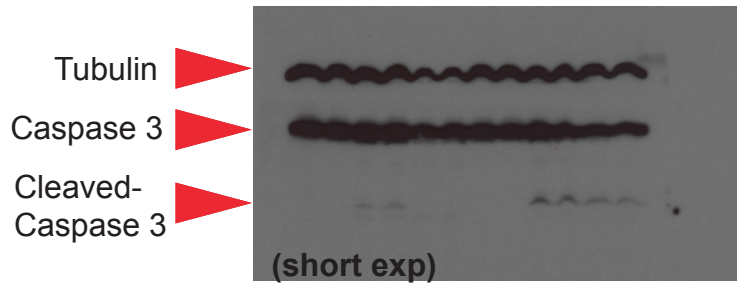

23/11/2016
