# Supplementary material for: An oligoclonal antibody durably overcomes resistance of lung cancer to third‐generation EGFR inhibitors
Source: PubMed Central journal article supplement (PMC5801506; doi:10.15252/emmm.201708076), 2017-12-06
Supplement: EMMM-10-294-s008.pdf [file EMMM-10-294-s008.pdf]

Figure 6B

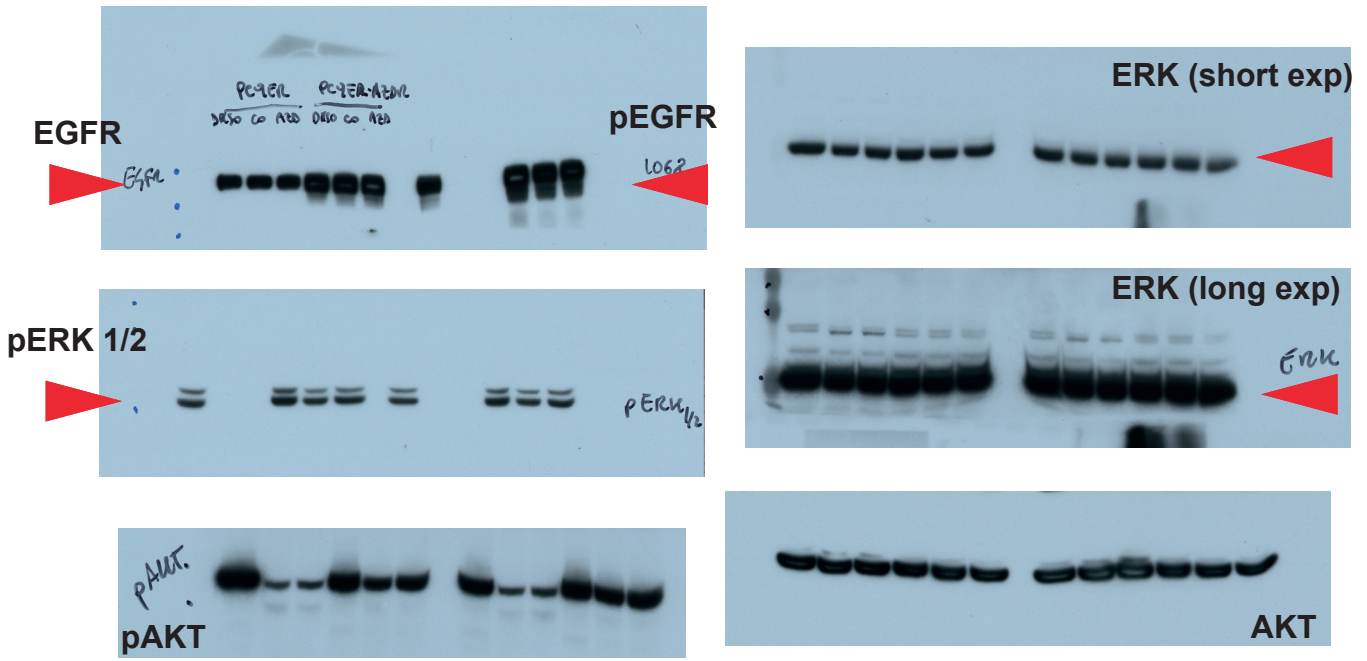

03/07/2015

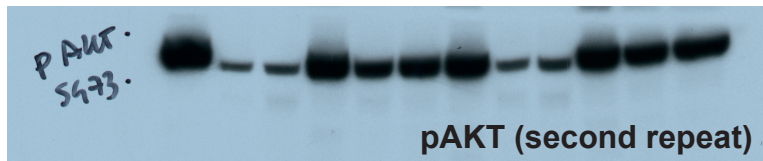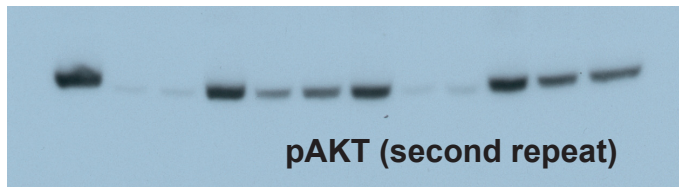

(second repeat) 06/07/2015
