# Supplementary material for: An oligoclonal antibody durably overcomes resistance of lung cancer to third‐generation EGFR inhibitors
Source: EMBO Mol Med. 2017 Dec 6;10(2):294–308. doi: 10.15252/emmm.201708076 (PMC5801506; doi:10.15252/emmm.201708076)
Supplement: Supplementary file 1 — Appendix [file EMMM-10-294-s001.pdf]

## **APPENDIX**

### **Table of content:**

- **Appendix Table S1**
- **Appendix Table S2**
- **Appendix Table S3**
- **Appendix Table S4**
- **Appendix Table S5**
- **Appendix Supplementary Methods**

**Appendix Table S1:**

Absolute counts obtained using the digital arrays (12.765; see Fig. EV5b and Fig. EV5c).

| Assay      | DNA amount | Sample Name | FAM-MGB Est. Targets | FAM-MGB Est.T-95L | FAM-MGB Est.T-95U | VIC-MGB Est. Targets | VIC-MGB Est.T-95L | VIC-MGB Est.T-95U |
|------------|------------|-------------|----------------------|-------------------|-------------------|----------------------|-------------------|-------------------|
| del746/750 | 2.5 ng     | PC9ER       | 450                  | 402               | 499               | 45                   | 31                | 58                |
|            |            | PC9ER-AZDR  | 770                  | 700               | 843               | 11                   | 4                 | 17                |
| T790M      | 2.5 ng     | PC9ER       | 190                  | 160               | 218               | 376                  | 333               | 419               |
|            |            | PC9ER-AZDR  | 663                  | 600               | 727               | 398                  | 353               | 443               |
| C797S      | 2.5 ng     | PC9ER       | 1                    | 0                 | 2                 | 544                  | 489               | 600               |
|            |            | PC9ER-AZDR  | 224                  | 192               | 255               | 470                  | 420               | 520               |
| RNASE P    | 2.5 ng     | PC9ER       | 0                    | 0                 | 0                 | 151                  | 125               | 176               |
|            |            | PC9ER-AZDR  | 0                    | 0                 | 0                 | 118                  | 95                | 139               |

**Appendix Table S2:**

Absolute counts obtained using the 12.765 digital arrays (see Figure 6D and Fig. EV5f).

| Dilution | Total DNA amount | Sample name | C797S-FAM Est. Targets | C797S-FAM Est.T-95L | C797S-FAM Est.T-95U | WT-VIC Est. Targets | WT-VIC Est.T-95L | WT-VIC Est.T-95U |
|----------|------------------|-------------|------------------------|---------------------|---------------------|---------------------|------------------|------------------|
| (1:1)    | 10 ng            | PC9ER       | 0                      | 0                   | 0                   | 2544                | 2292             | 2875             |
|          |                  | PC9ER-AZDR  | 1238                   | 1133                | 1353                | 2602                | 2341             | 2949             |
| (1:2)    | 5 ng             | PC9ER       | 0                      | 0                   | 0                   | 1204                | 1102             | 1315             |
|          |                  | PC9ER-AZDR  | 687                    | 622                 | 753                 | 1480                | 1354             | 1620             |
| (1:4)    | 2.5 ng           | PC9ER       | 0                      | 0                   | 0                   | 632                 | 572              | 695              |
|          |                  | PC9ER-AZDR  | 340                    | 299                 | 380                 | 773                 | 702              | 846              |
| (1:8)    | 1.25 ng          | PC9ER       | 0                      | 0                   | 0                   | 338                 | 297              | 378              |
|          |                  | PC9ER-AZDR  | 187                    | 158                 | 215                 | 368                 | 325              | 411              |
| (1:16)   | 0.625 ng         | PC9ER       | 0                      | 0                   | 0                   | 163                 | 136              | 189              |
|          |                  | PC9ER-AZDR  | 94                     | 73                  | 112                 | 175                 | 147              | 201              |
|          | 1 pg             | CTRL-WT     | 0                      | 0                   | 0                   | 5104                | 4230             | 6965             |
|          |                  | CTRL-MUT    | 5104                   | 4230                | 6965                | 0                   | 0                | 0                |

**Appendix Table S3:**  
**List of real-time PCR primers used in the study.**

| Target | Use           | Forward Primer (5'-3') | Reverse Primer (5'-3') |
|--------|---------------|------------------------|------------------------|
| MICA   | real-time PCR | TAAAATCCGGCGTAGTCCTG   | GCATGTCACGGTAATGTTC    |
| IL-8   | real-time PCR | GTCTGCTAGCCAGGATCCAC   | GCTTCCACATGTCCTCACAA   |
| ULBP1  | real-time PCR | GCTTCTGCACCTGCTGTCT    | AGGCCTTGAACCTTCACACCA  |
| ULBP2  | real-time PCR | CAGAGCAACTGCGTGACATT   | AACTGCCAAGATCCACTGCT   |
| EGFR   | real-time PCR | AGGACCAAGCAACATGGTCA   | CCTTGCAGCTGTTTTACCT    |
| B2M    | real-time PCR | GGCATTCTGAAGCTGAC      | TCTTTGGAGTACGCTGGATAG  |

**Appendix Table S4:**  
**List of primers used for genotyping assays and for digital PCR.**

| Target Mutation | Use              | Primers (for/rev)       | Probes                              |
|-----------------|------------------|-------------------------|-------------------------------------|
| EGFR del746/750 | genotyping /dPCR | TGGATCCCAGAAGGTGAGAAA   | VIC-TATCAAGGAATTAAGAGAGGC - MGB-NFQ |
|                 |                  | GCTTCATCGAGGATTTCTTGT   | FAM-TCGCTATCAAAACACT - MGB-NFQ      |
| EGFR T790M      | genotyping /dPCR | GCCTGCTGGGCATCTG        | VIC-ATGAGCTGCGTGATGAG-MGB-NFQ       |
|                 |                  | TCTTTGTGTTCCCGGACATAGTC | FAM-ATGAGCTGCATGATGAG-MGB-NFQ       |
| EGFR C797S      | genotyping /dPCR | GCCTGCTGGGCATCTG        | VIC-TTCGGCTGCCTCCTG-MGB-NFQ         |
|                 |                  | TCTTTGTGTTCCCGGACATAGTC | FAM-TTCGGCAGCCTCC-MGB-NFQ           |

**Appendix Table S5:**  
**List of exact *p*-values and additional statistical informations**

| Figure | Samples additional info           | n | technical repetitions        | Stars | Exact p value | Statistical test | Comparison test |
|--------|-----------------------------------|---|------------------------------|-------|---------------|------------------|-----------------|
| 1E     | Vehicle vs 3xmAbs                 | 5 | 6-8 slides/tumor             | ***   | 0.00033759    | one-way ANOVA    | Tukey           |
|        | Vehicle vs Osimertinib            |   |                              | ****  | 0.00000774    | one-way ANOVA    | Tukey           |
| 2E     | PC9ER Vehicle vs 3xmAbs           | 3 | 8 slides/tumor               | *     | 0.04105734    | one-way ANOVA    | Tukey           |
|        | Vehicle vs Osimertinib            |   |                              | ****  | 0.00000245    | one-way ANOVA    | Tukey           |
|        | H1975 Vehicle vs Osimertinib      |   |                              | ***   | 0.00022189    | one-way ANOVA    | Tukey           |
| 3D     | Vehicle vs 3xmAbs                 | 4 | 8 slides/tumor               | ****  | 0.000000024   | one-way ANOVA    | Tukey           |
| 3E     | Vehicle vs 3xmAbs                 | 4 | 100-200 cells each/condition | **    | 0.0019841     | one-way ANOVA    | Tukey           |
|        | Vehicle vs Osimertinib            |   |                              | ***   | 0.0003206     | one-way ANOVA    | Tukey           |
| 3F     | Vehicle vs 3xmAbs                 | 4 | 100-200 cells each/condition | **    | 0.00177182    | one-way ANOVA    | Tukey           |
|        | Vehicle vs Osimertinib            |   |                              | ****  | 0.00000025    | one-way ANOVA    | Tukey           |
| 3G     | Vehicle vs 3xmAbs                 | 4 | 100-200 cells each/condition | **    | 0.00193779    | one-way ANOVA    | Tukey           |
| 3H     | yH2AX Vehicle vs 3xmAbs           | 5 | 6-8 slides/tumor             | **    | 0.0031973     | one-way ANOVA    | Tukey           |
|        | Vehicle vs Osimertinib            |   |                              | ****  | 0.000097      | one-way ANOVA    | Tukey           |
|        | p16 Vehicle vs 3xmAbs             |   |                              | ***   | 0.0008426     | one-way ANOVA    | Tukey           |
| 4D     | Vehicle vs 3xmAbs                 | 6 | 7-8 slides/tumor             | **    | 0.001371046   | one-way ANOVA    | Tukey           |
|        | Vehicle vs Osimertinib            |   |                              | ***   | 0.00056159    | one-way ANOVA    | Tukey           |
|        | Vehicle vs 3xmAbs+Osimertinib     |   |                              | ****  | 0.000000046   | one-way ANOVA    | Tukey           |
|        | Osimertinib vs 3xmAbs+Osimertinib |   |                              | *     | 0.043247098   | one-way ANOVA    | Tukey           |
| 5C     | EGFR                              |   |                              | **    | 0.00129461    | one-way ANOVA    | Tukey           |
|        |                                   |   |                              | ****  | 0.00000148    | one-way ANOVA    | Tukey           |
|        |                                   |   |                              | ****  | 0.000000013   | one-way ANOVA    | Tukey           |
|        |                                   |   |                              | ***   | 0.00064323    | one-way ANOVA    | Tukey           |
|        | HER2                              | 3 | 3 slides/tumor               | *     | 0.02852016    | one-way ANOVA    | Tukey           |
|        |                                   |   |                              | ****  | 0.00000629    | one-way ANOVA    | Tukey           |
|        |                                   |   |                              | ****  | 0.00000044    | one-way ANOVA    | Tukey           |
|        |                                   |   |                              | ****  | 0.000000011   | one-way ANOVA    | Tukey           |
|        | HER3                              |   |                              | ****  | 0.000000001   | one-way ANOVA    | Tukey           |
|        |                                   |   |                              | ***   | 0.00089902    | one-way ANOVA    | Tukey           |
|        |                                   |   |                              | ****  | 0.00007014    | one-way ANOVA    | Tukey           |
|        |                                   |   |                              | ****  | 0.00001517    | one-way ANOVA    | Tukey           |
|        |                                   |   |                              | ****  | 0.00000133    | one-way ANOVA    | Tukey           |
| F6C    | PBS vs 3xmAbs                     | 3 | 3                            | **    | 0.006027      | T-test           |                 |
| F6F    | Vehicle vs 3xmAbs                 | 3 | 5-6 slides/tumor             | ***   | 0.00015       | one-way ANOVA    | Tukey           |
| EV1a   | PC9ER PBS vs CTX+TRZ+33           | 3 | 3                            | **    | 0.00340709    | one-way ANOVA    | Tukey           |
|        | H1975 PBS vs CTX+TRZ              |   |                              | **    | 0.00127856    | one-way ANOVA    | Tukey           |
|        | PBS vs CTX+TRZ+33                 |   |                              | ***   | 0.0006543     | one-way ANOVA    | Tukey           |
| EV3f   | PC9ER ULBP2                       | 3 | 3                            | *     | 0.0435        | T-test           |                 |
|        | H1975 ULPB1                       |   |                              | *     | 0.02961       | T-test           |                 |
|        | IL-8                              |   |                              | *     | 0.0386154     | T-test           |                 |
| EV3h   | no pretreatment PBS vs 3xmAbs     | 3 | 3                            | **    | 0.00260444    | one-way ANOVA    | Bonferroni      |
|        | pretreatment PBS vs CTX           |   |                              | *     | 0.01982778    | one-way ANOVA    | Bonferroni      |
|        | PBS vs 3xmAbs                     |   |                              | ***   | 0.00021116    | one-way ANOVA    | Bonferroni      |
| EV3c   | Vehicle vs 3xmAbs                 | 3 | 6-8 slides/tumor             | *     | 0.013745      | one-way ANOVA    | Tukey           |
|        | Vehicle vs Osimertinib            |   |                              | ***   | 0.000606      | one-way ANOVA    | Tukey           |
| EV3d   | Vehicle vs 3xmAbs                 | 3 | 6-8 slides/tumor             | ***   | 0.00064764    | one-way ANOVA    | Tukey           |

## Appendix Supplementary Methods

### Materials

Murine antibodies to HER3 and other receptors were generated in our laboratory. Cetuximab and trastuzumab were obtained from BMS and Roche, respectively. For immunoblotting, we used antibodies specific to p65 (#sc-372, 1:1000), ERK2 (#sc-271458, 1:1000), GAPDH (#sc-25778, 1:1000) and 53BP1 (#sc-22760, 1:1000), all from Santa Cruz Biotechnology. Anti-tubulin (#T6199, 1:5000), anti-GAPDH (1:1000) and anti-phosphorylated ERK (#M9692, 1:10000) were from

Sigma-Aldrich. Anti-EGFR (#ALX-804-064-C100, 1:1000) was from Alexis. Antibodies to phosphorylated EGFR (Tyr1068; #2234S, 1:1000), pAKT (Ser473; #4060S, 1:1000), AKT (#2938, 1:1000), caspase 3 (#9665, 1:1000), cleaved caspase 3 (#9664, 1:1000), BIM (#2933, 1:1000), caspase 9 (#9508, 1:1000), PARP (#9542, 1:1000), cleaved PARP (#5625, 1:1000), and KIP/p27 (#3686, 1:1000) were obtained from Cell Signaling. KI67-specific (#Ab16667, 1:1000), p16 (#Ab108349, 1:1000) and  $\gamma$ H2AX (#16667, 1:1000) antibodies were from AbCam. DCR2 (#ADI-APP-371-E, 1:1000), p15 (#C0287-1, 1:1000) and p21 (#556431, 1:1000) antibodies were respectively from Enzo Life Bioscience, Assay Biotech and BD Bioscience. For flow cytometry we used antibodies to EGFR (clone AY13), HER2 (clone 24D2) and HER3 (clone 1B4C3) that were respectively conjugated with the following fluorophores: Alexa Fluor 488, allophycocyanin, and phycoerythrin (BioLegend Inc.). Erlotinib and afatinib were obtained from LC Laboratories, and AZD9291 and CO-1686 were obtained from Selleckchem. 3-(4,5-dimethylthiazol-2-yl)-2,5-diphenyl tetrazolium bromide (MTT) was obtained from Sigma-Aldrich. Nuclear Fast Red solution was purchased from Sigma.

### **Cell cultures**

Unless indicated, cells were obtained from the American Type Tissue Culture Collection (ATCC). The PC9 set of cell lines included the erlotinib-sensitive PC9 (EGFR del746–750) and erlotinib-resistant PC9ER (del746–750+T790M) NSCLC cell lines. The PC9ER-AZDR derivative cells we generated were grown under the same conditions as the parental cell lines, namely in RPMI-1640 medium supplemented with 10% fetal calf serum (Life Technologies) and antibiotics. NL20 cells (normal human lung epithelial cells), also from ATCC, were used as control. All cell lines were routinely checked for mycoplasma contamination.

### **Cell growth, apoptosis and immunoblotting assays**

Apoptosis was determined using flow cytometry. Annexin V, 7-amino-actinomycin D (7-AAD) and a kit were from BioLegend. For immunoblotting, cells were extracted in Lysis Buffer (50 mM Hepes (pH 7.5), 10% glycerol, 150 mM NaCl, 1% Triton X-100, 1 mM EDTA, 1 mM EGTA, 10 mM NaF, 0.1 mM Na<sub>3</sub>VO<sub>4</sub>, and a complete protease inhibitor cocktail). Tumor xenografts were processed with Lysing Matrix D Tubes (MP Biomedicals) prior to protein extraction. Following protein separation using gel electrophoresis and transfer to nitrocellulose membranes, immunoblotting was performed according to the antibody manufacturers' recommendation. Antibody binding to membrane blots was detected using horseradish peroxidase–secondary antibodies (Jackson ImmunoResearch Laboratories), followed by treatment with ECL Western blotting detection reagents (from GE Healthcare).

### **Immunoblotting analyses**

Whole cell extracts were resolved using gel electrophoresis and proteins were transferred to nitrocellulose membranes. The membranes were blocked with 5% non-fat dried milk in Tris-buffered saline containing 0.05% Tween-20 (TBS-T), and incubated overnight with the desired primary antibody. Subsequently, the membranes were washed three times, and bound antibodies were detected using the appropriate horseradish peroxidase-conjugated secondary antibodies (for 60 minutes),

followed by probing using an ECL Plus Western blotting Detection System (GE Healthcare Bio-Sciences). ECL was detected using a Molecular ImagerR ChemiDoc™ System (from Bio-Rad Laboratories) and images were acquired using the ImageLab Software.

### **Cell cycle analysis**

Following drug treatment, cells were incubated for 60 minutes with BrdU (10  $\mu$ M), washed, harvested and fixed in 70% ethanol (at 4°C). Prior to analysis, cells were incubated in a denaturation solution (2N HCl, 0.5% Triton-X100; 30 min), followed by a neutralization solution (0.1 M sodium borate, pH 8.5; 30 min). BrdU was probed using an anti-BrdU antibody coupled to APC. Total cellular DNA was stained in a propidium iodide (PI) solution supplemented with RNase A. This was followed by data acquisition using BD FACS Aria III. Cell cycle distribution was analyzed using BD FACSDiva 8.

### **EGFR exon 20 cloning**

Genomic DNA was extracted from PC9ER-AZDR cells using Pure Link genomic DNA Kit (Invitrogen). PCR reaction was performed using specific primers (forward: 5'-CACCATGCGAAGCCACACTG-3', and reverse: 5'-CTGGCTCCTTATCTCCCCTCC-3') and Iproof HF taq polymerase (BioRad). PCR products were cleaned and cloned into the pENTR/TOPO vector (Invitrogen) following the manufacture's instructions. After bacteria transformation and antibiotic selection, approximately 40 positive colonies were isolated. Plasmids were sequenced using M13 forward and M13 reverse primers.

### **Immunofluorescence**

Cells were grown on sterile coverslips and fixed for 15 min at room temperature with phosphate-buffered saline (PBS) containing paraformaldehyde (4%). After rinsing, cells were permeabilized with Triton X-100 (0.5%) and blocked for 30 minutes at room temperature with bovine serum albumin (1%) and Tween 20 (0.2%). Coverslips were incubated overnight with  $\gamma$ -H2AX (1:200), p16 (1:200) or KI67 (1:200) antibodies in blocking buffer. The coverslips were rinsed in saline and then incubated with Alexa555-conjugated donkey anti-rabbit or anti-mouse secondary antibody. Cells were washed again in saline, counterstained with DAPI (Sigma-Aldrich) and mounted in ProLong mounting medium. Samples were examined using a Spinning Disk Confocal Microscope (Zeiss).

### **$\beta$ -galactosidase staining**

Detection of  $\beta$ -Gal activity was performed on frozen sections of tumor xenografts or on cultured cells. Sections were fixed in 0.5% glutaraldehyde (pH 7.4) in saline for 15 minutes, washed in saline supplemented with 1 mM MgCl<sub>2</sub> at pH 5.5, and stained for 5–6 hours at 37°C without CO<sub>2</sub> in saline containing 1mM MgCl<sub>2</sub> at pH 5.5, 1 mg/ml X-Gal, and 5 mM of each, potassium ferricyanide and potassium ferrocyanide. Thereafter, samples were washed twice and exposed for 30 minutes to formaldehyde (4%). Cryosections were additionally counterstained with Eosin. Photos were then taken using the Olympus SZX16 stereomicroscope.

### **Immunohistochemistry and histological staining**

Mice were scarified and tumors were extracted and fixed in paraffin. Tissue sections were deparaffinized and rehydrated in an ethanol series. Antigen retrieval was performed at 100°C in citrate buffer (pH 6). Following blocking in 4% horse serum-containing solution (120 minutes), slides were incubated overnight with a primary antibody as follows:  $\gamma$ -H2AX (1:100), p21 (1:50), p16 (1:200) or KI67 (1:100). After incubation with HRP-conjugated secondary antibody (60 minutes at room temperature) staining was developed using the DAB kit (Vector Laboratories, Burlingame, CA), followed by Hematoxylin counterstaining (Sigma). Finally, slides were dehydrated and mounted with coverslips. Hematoxylin and Eosin (H&E) staining was performed on paraffin sections.

### **Immunofluorescence detection of receptor proteins in tumors**

Tumors were harvested, formalin fixed and paraffin-embedded (FFPE). The corresponding sections (4  $\mu$ m), obtained from each tissue block, were analyzed using immunofluorescence and an antibody to EGFR (Cell signaling, #4267S, 1:50), anti-HER-2 (Cell Signaling, #4290S, 1:50) or anti HER-3 (Cell Signaling #12708S, 1:50). FFPE tissues were deparaffinized in xylene and rehydrated in graded ethanol. Sections were incubated in acetone (-20 °C, 7 min) followed by antigen retrieval in Tris-EDTA solution (pH 9.0), in a microwave (for 10 minutes). After three washes in saline the slides were blocked in buffer containing 20% normal horse serum, followed by treatment with an avidin-biotin blocking solution for 15 minutes and then incubated overnight with the corresponding primary antibody. Slides were incubated for 24 hours at room temperature followed by incubation for 48 hours at 4°C. Sections were washed and incubated with a biotinylated anti-rabbit secondary antibody for 90 minutes at room temperature, followed by a Cy3-conjugated streptavidin. Sections were washed with Aqua Polymount. Stained sections were examined and photographed using a fluorescence microscope (Eclipse Ni-U, Nikon, Tokyo, Japan) equipped with Plan Fluor objectives (20X), connected to a monochrome camera (DS-Qi1, Nikon).

### **Flow cytometry analyses of surface receptors**

To determine surface receptor abundance, cells were treated with trypsin and washed twice in albumin containing saline (1% weight/volume). Thereafter, cells were incubated for 30 minutes at 4°C with anti-EGFR-FITC (1:200) , anti-HER2-APC (1:150) or anti-HER3-PE (1:100) antibodies. Cells were then washed twice and processed. The capability of the antibodies to bind with surface-localized receptors was correlated to the fluorescence intensity measured using the LSRII flow cytometer.
